# Supplementary material for: Biofilm formation potential and chlorine resistance of typical bacteria isolated from drinking water distribution systems
Source: Royal Society of Chemistry journal article supplement (doi:10.1039/d0ra04985a), 2020-01-01
Supplement: d0ra04985a1.pdf [file d0ra04985a1.pdf]

Electronic Supplementary Material (ESI) for RSC Advances.

## Biofilm formation potential and chlorine resistance of typical bacteria isolated from drinking water distribution systems

Zebing Zhu,<sup>ab</sup> Lili Shan,<sup>\*a</sup> Fengping Hu,<sup>\*a</sup> Zehua Li,<sup>a</sup> Dan Zhong,<sup>b</sup> Yixing Yuan<sup>b</sup> and Jie Zhang<sup>b</sup>

a. School of Civil Engineering and Architecture, East China Jiao Tong University, Nanchang, 330013, China. E-mail: hitshanlili@163.com; hufengping1968@126.com

b. State Key Laboratory of Urban Water Resource and Environment, School of Environment, Harbin Institute of Technology, Harbin, 150090, China

**Table S1** Basic information of tested bacteria strains.

| GeneBank<br>Accession<br>NO. | Identified bacteria<br>(similarity)                         | Taxonomy                            | Colony morphology                                                              | Cell morphology                              |                |                                        |
|------------------------------|-------------------------------------------------------------|-------------------------------------|--------------------------------------------------------------------------------|----------------------------------------------|----------------|----------------------------------------|
|                              |                                                             |                                     |                                                                                | Shape                                        | Gram           | Biochemical<br>reaction                |
| MT279969                     | <i>Sphingomonas</i> sp.<br>(DQ840049,<br>99%)               | Alphaproteobacteria                 | Round, uniaquaversal<br>upwarping, smooth,<br>yellowish brown/bright<br>yellow | Short rod<br>(oval)                          | G <sup>-</sup> | oxidase positive,<br>catalase positive |
| MT279968                     | <i>Acidovorax defluvii</i><br>(NR026506,<br>99%)            | Betaproteobacteria                  | Convex surface, smooth,<br>beige/light yellow                                  | Straight rod                                 | G <sup>-</sup> | oxidase egative,<br>catalase positive  |
| MT279971                     | <i>Acinetobacter</i> sp.<br>(FR677019, 99%)                 | Gammaproteobacteria                 | Round, convex surface,<br>smooth, slightly opaque,<br>light yellow             | Short rod<br>(round)                         | G <sup>-</sup> | oxidase egative,<br>catalase positive  |
| MT279970                     | <i>Bacillus cereus</i><br>(GQ462533,<br>99%)                | Firmicutes, Bacilli                 | Round, not smooth,<br>irregular edge, milky                                    | Rod                                          | G <sup>+</sup> | oxidase egative,<br>catalase positive  |
| MT279967                     | <i>Microbacterium<br/>laevaniformans</i><br>(JQ229810, 99%) | Actinobacteria,<br>Actinobacteridae | Round, slight bulge,<br>rough, opaque yellow                                   | Fine, long and<br>irregular rod<br>(V shape) | G <sup>+</sup> | oxidase egative,<br>catalase positive  |

Note: G<sup>+</sup>: Gram-positive bacteria, G<sup>-</sup>: Gram-negative bacteria.

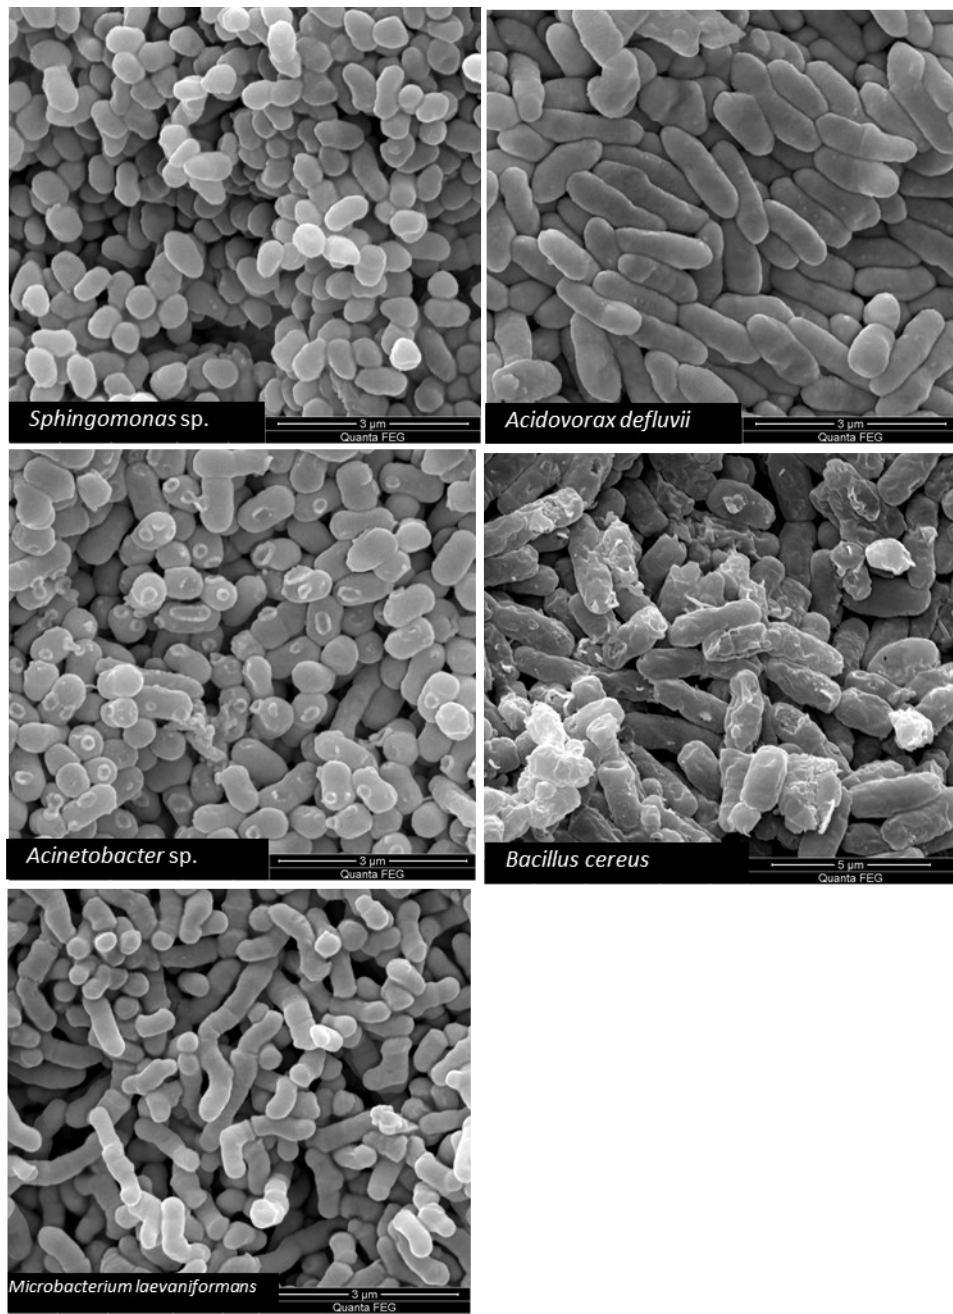

Fig. S1 SEM images of tested bacteria strains (40 000 $\times$  or 20 000 $\times$ ).

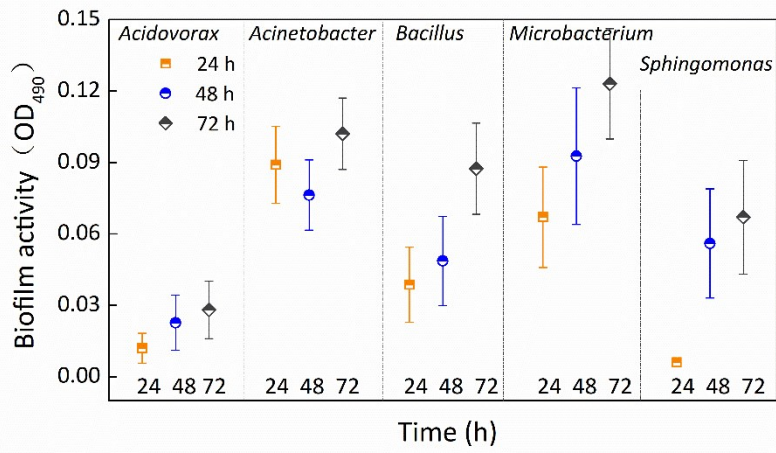

**Fig. S2** Biofilm activity of single-species biofilm at different incubation times. The average error bar percentages are 48.04% for *Acidovorax defluvii*, 17.30% for *Acinetobacter* sp., 33.58% for *Bacillus cereus*, 27.03% for *Microbacterium laevaniformans*, and 34.90% for *Sphingomonas* sp..
